# Supplementary material for: Alpha-Fetoprotein as a Potential Surrogate Biomarker for Atezolizumab + Bevacizumab Treatment of Hepatocellular Carcinoma
Source: Oxford University Press journal article supplement (doi:10.1158/1078-0432.ccr-21-3275), 2022-04-18
Supplement: ccr-21-3275_table_s1_suppts1.docx [file ccr-21-3275_table_s1_suppts1.docx]

**Supplementary Table S1. Receiver operating characteristic curve outputs for each time window based on RECIST 1.1.**

| **Time window** | **n** | **Responders vs  non-responders** | | | **Disease control vs  primary progressors** | | |
| --- | --- | --- | --- | --- | --- | --- | --- |
| **AUC** | **Optimal cutoff, %** | **Sensitivity + specificity** | **AUC** | **Optimal cutoff, %** | **Sensitivity + specificity** |
| **Week 3** | 62 | 0.76 | 56.15 | 1.42 | 0.90 | 21.29 | 1.70 |
| **Week 6** | 58 | 0.84 | 76.06 | 1.62 | 0.96 | −9.38 | 1.91 |
| **Week 9** | 57 | 0.83 | 78.54 | 1.62 | 0.96 | −11.84 | 1.83 |
|  | | | | | | | |

AUC, area under the curve; RECIST 1.1, Response Evaluation Criteria in Solid Tumors version 1.1.
